# Supplementary material for: An improved termite life cycle optimizer algorithm for global function optimization
Source: PeerJ journal article supplement (doi:10.7717/peerj-cs.2671), 2025-02-17
Supplement: CEC2020.pdf [file CEC2020.pdf]

See discussions, stats, and author profiles for this publication at: <https://www.researchgate.net/publication/338711283>

# Problem Definitions and Evaluation Criteria for the CEC 2020 Special Session on Multimodal Multiobjective Optimization

Technical Report · December 2019

DOI: 10.13140/RG.2.2.31746.02247

CITATIONS

52

READS

7,044

5 authors, including:

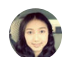

Jing Liang

Zhengzhou University

120 PUBLICATIONS 17,651 CITATIONS

SEE PROFILE

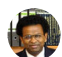

Ponnuthurai N. Suganthan

Qatar University

653 PUBLICATIONS 67,359 CITATIONS

SEE PROFILE

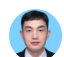

Cai Tong Yue

Zhengzhou University

107 PUBLICATIONS 3,478 CITATIONS

SEE PROFILE

# **Problem Definitions and Evaluation Criteria for the CEC 2020 Special Session on Multimodal Multiobjective Optimization**

**J. J. Liang<sup>1</sup>, P. N. Suganthan<sup>2</sup>, B. Y. Qu<sup>3</sup>, D. W. Gong<sup>4</sup> and C. T. Yue<sup>1</sup>**

<sup>1</sup> School of Electrical Engineering, Zhengzhou University, Zhengzhou, China

<sup>2</sup> School of EEE, Nanyang Technological University, Singapore

<sup>3</sup> School of Electric and Information Engineering, Zhongyuan University of Technology, Zhengzhou,  
China

<sup>4</sup> School of Information and Control Engineering, China University of Mining and Technology, Xuzhou,  
China

liangjing@zzu.edu.cn, epnsugan@ntu.edu.sg, qby1984@hotmail.com, dwgong@vip.163.com,  
zzuyuecaitong@163.com

**Technical Report 201912, Computational Intelligence Laboratory,  
Zhengzhou University, Zhengzhou China  
And  
Technical Report, Nanyang Technological University, Singapore**

**December 2019**

In multiobjective optimization problems, there may exist two or more global or local Pareto optimal sets (PSs) and some of them may correspond to the same Pareto Front (PF). These problems are defined as multimodal multiobjective optimization problems (MMOPs) [1, 2]. Arguably, finding one of these multiple PSs may be sufficient to obtain an acceptable solution for some problems. However, failing to identify more than one of the PSs may prevent the decision maker from considering solution options that could bring about improved performance. Recently, many researchers [3-10] proposed different multimodal multiobjective optimization (MMO) algorithms, so there is definitely a need of evaluating these algorithms in a more systematic manner on an open and fair competition platform.

In the MMO test suite of CEC'2020, a set of MMO test problems with different characters are designed, such as problems with different shape of PSs and PFs, coexistence of local and global PSs, scalable number of PSs, decision variables and objectives. In addition, a fair and appropriate evaluation criterion and reference data are given to assess the performance of different MMO algorithms.

The Matlab codes for the MMO test suite of CEC'2020 can be downloaded from the website given below:

<https://github.com/P-N-Suganthan>

## 1 Introduction to the CEC'2020 MMO test problems

### 1.1 Some Definitions

Given a multiobjective optimization problem  $\text{Min } \vec{f}(\vec{x}) = [f_1(\vec{x}), f_2(\vec{x}), \dots, f_m(\vec{x})]$ , a feasible solution  $\vec{x}_1$  is said to dominate [1] the other feasible  $\vec{x}_2$  if both of the two conditions are met:

- 1) The solution  $\vec{x}_1$  is no worse than  $\vec{x}_2$  for all objectives, i.e.  $f_i(\vec{x}_1) \leq f_i(\vec{x}_2)$  for  $i = 1, \dots, m$ ;
- 2) The solution  $\vec{x}_1$  is strictly better than  $\vec{x}_2$  for at least one objective, i.e.  $f_i(\vec{x}_1) < f_i(\vec{x}_2)$  for  $i \in [1, m]$ .

If a solution is not dominated by any other solutions, it is called a *nondominated* solution. The *nondominated* solution set is called Pareto optimal set (PS). The set of vectors in the objective space that corresponds to the PS is called Pareto front (PF).

The definitions of Local PS, PF and Global PS, PF [1, 11] are as follows:

**Local Pareto optimal set** (Local PS): For arbitrary solution  $\vec{x}$  in a solution set  $P_L$ , if there is no neighborhood solution  $\vec{y}$  satisfying  $\|\vec{y} - \vec{x}\|_\infty \leq \sigma$  ( $\sigma$  is a small positive value), dominating any solution in the set  $P_L$ , then  $P_L$  is called Local Pareto optimal set;

**Global Pareto optimal set** (Global PS): For arbitrary solution in a solution set  $P_G$ , if there is no solution dominating any solution in the set  $P_G$ , then  $P_G$  is called Global Pareto optimal set.

**Local Pareto Front** (Local PF): The set of all the vectors in the objective space that corresponds to the Local PS is defined as Local Pareto Front.

**Global Pareto Front** (Global PF): The set of all the vectors in the objective space that corresponds to the Global PS is defined as Global Pareto Front.

Fig. 1 shows a bi-objective minimization problem with two Global PSs and one Local PS. Solid lines with stars are global PS/PF, while dashed lines with circles dots represent local PS/PF. Note that a certain multimodal multiobjective problem may have several Local PSs and Global PSs.

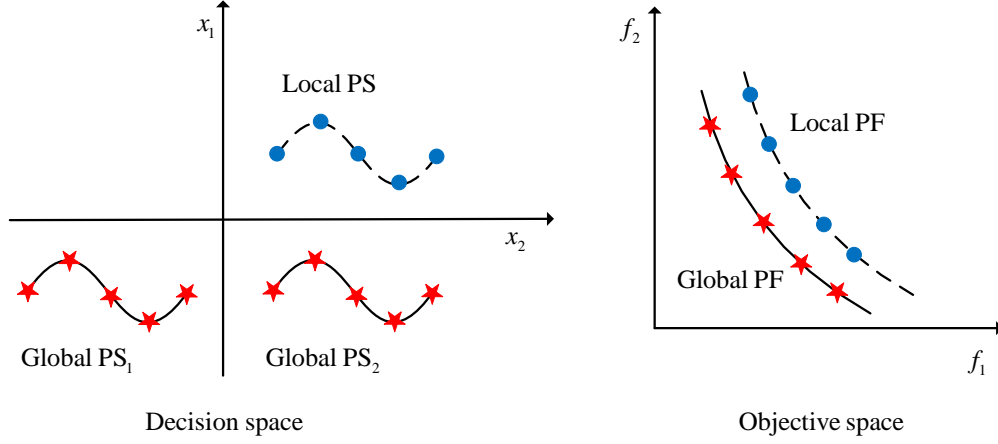

Fig. 1. Illustration of Local PS, Global PS, Local PF, and Global PF.

The method to judge whether a given multiobjective optimization problem is MMO problem or not is given in this report. For a multiobjective optimization problem, if it meets one of the following conditions, it is a MMO problem:

- 1) It has at least one local Pareto optimal solution;
- 2) It has at least two global Pareto optimal solutions corresponding to the same point on the PF.

The solution which is not dominated by any neighborhood solution is called local Pareto optimal solution. The solution which is not dominated by any solutions in the feasible space is called global Pareto optimal solution.

## 1.2 Summary of the CEC'2020 MMO test problems

The characters of the MMO test functions are shown in Table I. In the last column of Table I,  $N_{ops}$  represents the number of PS to be obtained.  $N_{ops} = N_{global} + N_{local}$  where  $N_{global}$  represents the number of global PS need to be obtained and  $N_{local}$  represent the number of local PSs need to be obtained. Only the shading problems' local PS need to be obtained. The equations of MMF10 and MMF10\_l are the same, but their reference data are different. The reference data of MMF10 only include global PS and PF while those of MMF10\_l include both local and global PS and PF. MMF11\_l, MMF12\_l, MMF13\_l, MMF15\_l and MMF15\_a\_l are of the same situation.

Table I. Information and features of the MMO test problems suite

|    | MMO test<br>problem<br>name | Scalable<br>number<br>of<br>variables | Scalable<br>number<br>of<br>objectives | Pareto optima known | Pareto front geometry | Pareto set geometry | Scalable<br>number<br>of<br>Pareto set | $N_{ops}$ ( $N_{global}$ + $N_{local}$ ) |
|----|-----------------------------|---------------------------------------|----------------------------------------|---------------------|-----------------------|---------------------|----------------------------------------|------------------------------------------|
| 1  | MMF1                        | ×                                     | ×                                      | ✓                   | Convex                | Nonlinear           | ×                                      | 2 + 0                                    |
| 2  | MMF2                        | ×                                     | ×                                      | ✓                   | Convex                | Nonlinear           | ×                                      | 2 + 0                                    |
| 3  | MMF4                        | ×                                     | ×                                      | ✓                   | Concave               | Nonlinear           | ×                                      | 2 + 0                                    |
| 4  | MMF5                        | ×                                     | ×                                      | ✓                   | Convex                | Nonlinear           | ×                                      | 2 + 0                                    |
| 5  | MMF7                        | ×                                     | ×                                      | ✓                   | Convex                | Nonlinear           | ×                                      | 2 + 0                                    |
| 6  | MMF8                        | ×                                     | ×                                      | ✓                   | Concave               | Nonlinear           | ×                                      | 2 + 0                                    |
| 7  | MMF10                       | ×                                     | ×                                      | ✓                   | Convex                | Linear              | ×                                      | 1 + 0                                    |
| 8  | MMF11                       | ×                                     | ×                                      | ✓                   | Convex                | Linear              | ✓                                      | 1 + 0                                    |
| 9  | MMF12                       | ×                                     | ×                                      | ✓                   | Convex                | Linear              | ✓                                      | 1 + 0                                    |
| 10 | MMF13                       | ×                                     | ×                                      | ✓                   | Convex                | Nonlinear           | ✓                                      | 1 + 0                                    |
| 11 | MMF14                       | ✓                                     | ✓                                      | ✓                   | Concave               | Linear              | ✓                                      | 2 + 0                                    |
| 12 | MMF15                       | ✓                                     | ✓                                      | ✓                   | Concave               | Linear              | ✓                                      | 1 + 0                                    |
| 13 | MMF1_e                      | ×                                     | ×                                      | ✓                   | Convex                | Nonlinear           | ×                                      | 2 + 0                                    |
| 14 | MMF14_a                     | ✓                                     | ✓                                      | ✓                   | Concave               | Nonlinear           | ✓                                      | 2 + 0                                    |
| 15 | MMF15_a                     | ✓                                     | ✓                                      | ✓                   | Concave               | Nonlinear           | ✓                                      | 1 + 0                                    |
| 16 | MMF10_l                     | ×                                     | ×                                      | ✓                   | Convex                | Linear              | ×                                      | 1 + 1                                    |
| 17 | MMF11_l                     | ×                                     | ×                                      | ✓                   | Convex                | Linear              | ✓                                      | 1 + 1                                    |
| 18 | MMF12_l                     | ×                                     | ×                                      | ✓                   | Convex                | Linear              | ✓                                      | 1 + 1                                    |
| 19 | MMF13_l                     | ×                                     | ×                                      | ✓                   | Convex                | Nonlinear           | ✓                                      | 1 + 1                                    |
| 20 | MMF15_l                     | ✓                                     | ✓                                      | ✓                   | Concave               | Linear              | ✓                                      | 1 + 1                                    |
| 21 | MMF15_a_l                   | ✓                                     | ✓                                      | ✓                   | Concave               | Nonlinear           | ✓                                      | 1 + 1                                    |
| 22 | MMF16_l1                    | ✓                                     | ✓                                      | ✓                   | Concave               | Linear              | ✓                                      | 2 + 1                                    |
| 23 | MMF16_l2                    | ✓                                     | ✓                                      | ✓                   | Concave               | Linear              | ✓                                      | 1 + 2                                    |
| 24 | MMF16_l3                    | ✓                                     | ✓                                      | ✓                   | Concave               | Linear              | ✓                                      | 2 + 2                                    |

$N_{ops}$  represents the number of PS to be obtained.  $N_{ops} = N_{global} + N_{local}$  where  $N_{global}$  represents the number of global PS need to be obtained and  $N_{local}$  represent the number of local PSs need to be obtained.

\*Please Notice: These problems should be treated as black-box problems. The explicit equations of the problems are not allowed to be used. However, the dimensionality of the problems and the total number of function evaluations can be considered as known values which can be used to design your algorithm.

### 1.3 Definitions of the CEC'2020 MMO test problems

The equations and figures of true PS and PF are present in this subsection.

#### MMF1

$$\begin{cases} f_1 = |x_1 - 2| \\ f_2 = 1 - \sqrt{|x_1 - 2|} + 2(x_2 - \sin(6\pi|x_1 - 2| + \pi))^2 \end{cases}$$

Its search space is

$$x_1 \in [1, 3], \quad x_2 \in [-1, 1].$$

Its global PSs are

$$\begin{cases} x_1 = x_1 \\ x_2 = \sin(6\pi|x_1 - 2| + \pi) \end{cases}$$

where  $1 \leq x_1 \leq 3$ .

Its global PFs are

$$f_2 = 1 - \sqrt{f_1}$$

where  $0 \leq f_1 \leq 1$ .

Its true PSs and PF are illustrated in Fig. 2.

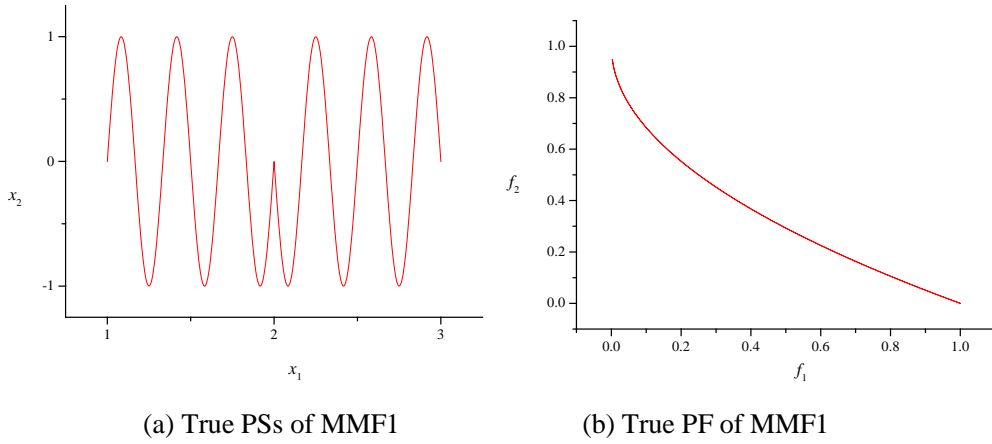

Fig. 2. The true PSs and PF of MMF1.

#### MMF1\_e

$$\text{Min} \begin{cases} f_1 = |x_1 - 2| \\ f_2 = \begin{cases} 1 - \sqrt{|x_1 - 2|} + 2(x_2 - \sin(6\pi|x_1 - 2| + \pi))^2, & x_1 \in [1, 2) \\ 1 - \sqrt{|x_1 - 2|} + 2(x_2 - a^{x_1} \sin(6\pi|x_1 - 2| + \pi))^2, & x_1 \in [2, 3] \end{cases} \end{cases}$$

where  $a > 0$  &  $a \neq 1$  ( $a$  controls the amplitude of the global PS in  $x_1 \in [2, 3]$ ).

Its search space is

$$x_1 \in [1, 3], \quad x_2 \in [-a^3, a^3].$$

Its global PSs are

$$x_2 = \begin{cases} \sin(6\pi|x_1 - 2| + \pi), & x_1 \in [1, 2) \\ a^{x_1} \sin(2\pi|x_1 - 2| + \pi), & x_1 \in [2, 3] \end{cases}$$

where  $a > 0$  &  $a \neq 1$ .

Its global PF is

$$f_2 = 1 - \sqrt{f_1}, f_1 \in [0, 1]$$

When  $a = e$ , its true PSs and PF are shown in Fig. 3.

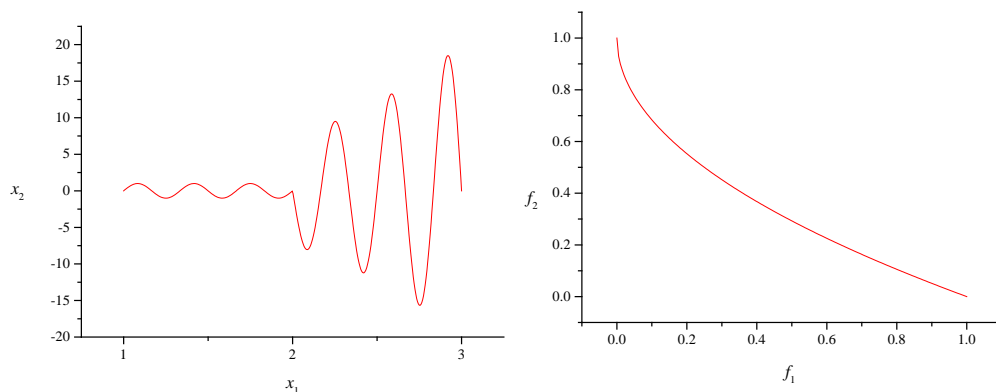

(a) True PSs of MMF1\_e

(b) True PF of MMF1\_e

Fig. 3. The true PSs and PF of MMF1\_e.

## MMF2

$$\begin{cases} f_1 = x_1 \\ f_2 = \begin{cases} 1 - \sqrt{x_1} + 2(4(x_2 - \sqrt{x_1})^2 \\ -2 \cos(\frac{20(x_2 - \sqrt{x_1})\pi}{\sqrt{2}}) + 2), & 0 \leq x_2 \leq 1 \\ 1 - \sqrt{x_1} + 2(4(x_2 - 1 - \sqrt{x_1})^2 \\ -\cos(\frac{20(x_2 - 1 - \sqrt{x_1})\pi}{\sqrt{2}}) + 2), & 1 < x_2 \leq 2 \end{cases} \end{cases}$$

Its search space is

$$x_1 \in [0, 1], x_2 \in [0, 2].$$

Its global PSs are

$$\begin{cases} x_2 = x_2 \\ x_1 = \begin{cases} x_2^2 & 0 \leq x_2 \leq 1 \\ (x_2 - 1)^2 & 1 < x_2 \leq 2 \end{cases} \end{cases}$$

Its global PFs are

$$f_2 = 1 - \sqrt{f_1}$$

where  $0 \leq f_1 \leq 1$ .

Its true PSs and PF are illustrated in Fig. 4.

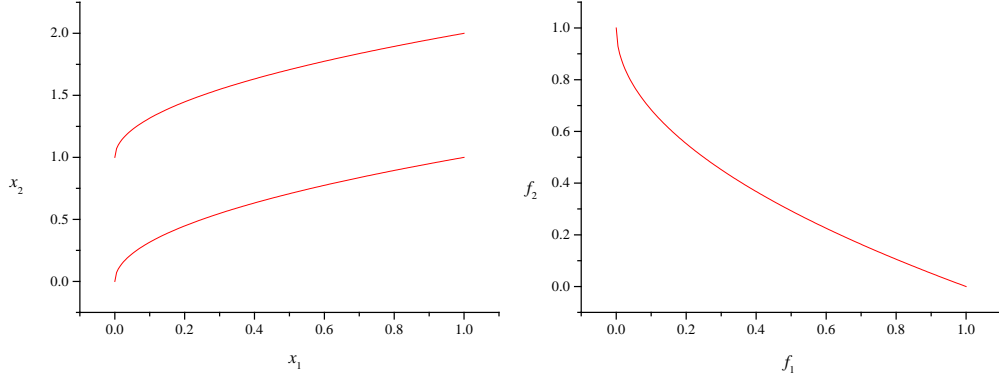

(a) True PSs of MMF2

(b) True PF of MMF2

Fig. 4. The true PSs and PF of MMF2.

#### MMF4

$$\begin{cases} f_1 = |x_1| \\ f_2 = \begin{cases} 1 - x_1^2 + 2(x_2 - \sin(\pi|x_1|))^2 & 0 \leq x_2 < 1 \\ 1 - x_1^2 + 2(x_2 - 1 - \sin(\pi|x_1|))^2 & 1 \leq x_2 \leq 2 \end{cases} \end{cases}$$

Its search space is

$$x_1 \in [-1, 1], \quad x_2 \in [0, 2].$$

Its global PSs are

$$\begin{cases} x_1 = x_1 \\ x_2 = \begin{cases} \sin(\pi|x_1|) & 0 \leq x_2 \leq 1 \\ \sin(\pi|x_1|) + 1 & 1 < x_2 \leq 2 \end{cases} \end{cases}$$

Its global PFs are

$$f_2 = 1 - f_1^2$$

where  $0 \leq f_1 \leq 1$ .

Its true PSs and PF are illustrated in Fig. 5.

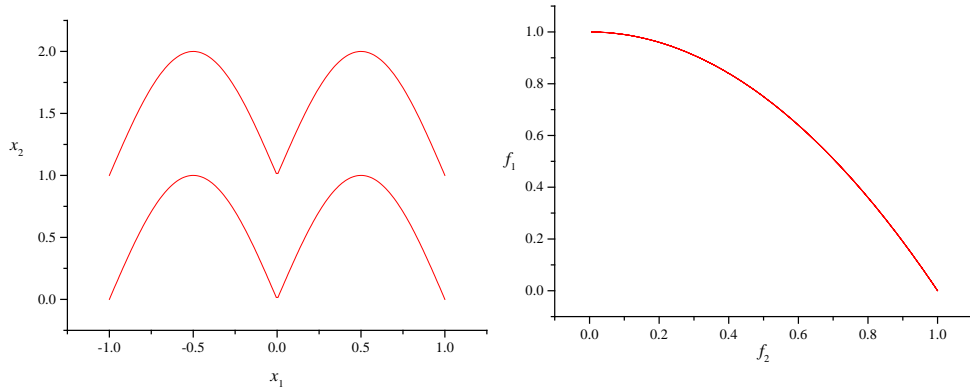

(a) True PSs of MMF4

(b) True PF of MMF4

Fig. 5. The true PSs and PF of MMF4.



### MMF5

$$\begin{cases} f_1 = |x_1 - 2| \\ f_2 = \begin{cases} 1 - \sqrt{|x_1 - 2|} + 2(x_2 - \sin(6\pi|x_1 - 2| + \pi))^2 & -1 \leq x_2 \leq 1 \\ 1 - \sqrt{|x_1 - 2|} + 2(x_2 - 2 - \sin(6\pi|x_1 - 2| + \pi))^2 & 1 < x_2 \leq 3 \end{cases} \end{cases}$$

Its search space is

$$x_1 \in [-1, 3], \quad x_2 \in [1, 3].$$

Its global PSs are

$$x_2 = \begin{cases} \sin(6\pi|x_1 - 2| + \pi) & -1 \leq x_2 \leq 1 \\ \sin(6\pi|x_1 - 2| + \pi) + 2 & 1 < x_2 \leq 3 \end{cases}$$

Its global PFs are

$$f_2 = 1 - \sqrt{f_1}$$

where  $0 \leq f_1 \leq 1$ .

Its true PSs and PF are illustrated in Fig. 6.

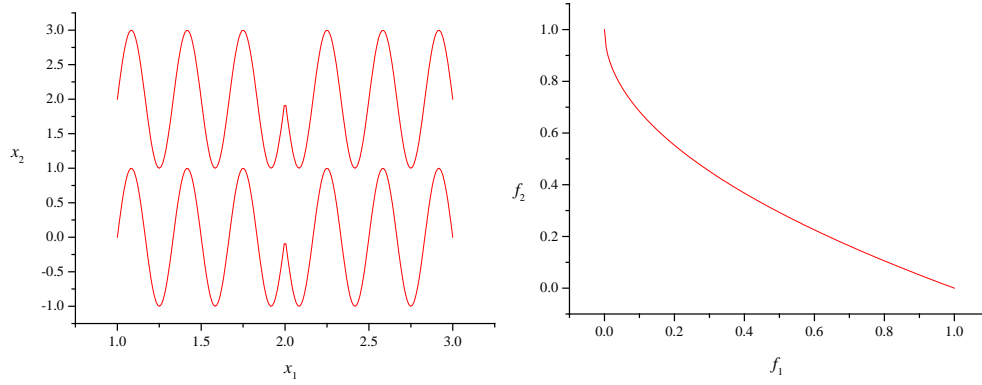

(a) True PSs of MMF5

(b) True PF of MMF5

Fig. 6. The true PSs and PF of MMF5.

### MMF7

$$\begin{cases} f_1 = |x_1 - 2| \\ f_2 = 1 - \sqrt{|x_1 - 2|} + \left\{ x_2 - [0.3|x_1 - 2| \cdot \cos(24\pi|x_1 - 2| + 4\pi) + 0.6|x_1 - 2| \cdot \sin(6\pi|x_1 - 2| + \pi)] \right\}^2 \end{cases}$$

Its search space is

$$x_1 \in [1, 3], \quad x_2 \in [-1, 1].$$

Its global PSs are

$$x_2 = [0.3|x_1 - 2| \cos(24\pi|x_1 - 2| + 4\pi) + 0.6|x_1 - 2| \cdot \sin(6\pi|x_1 - 2| + \pi)]$$

where  $1 \leq x_1 \leq 3$ .

Its global PFs are

$$f_2 = 1 - \sqrt{f_1}$$

where  $0 \leq f_1 \leq 1$ .

Its true PSs and PF are illustrated in Fig. 7.

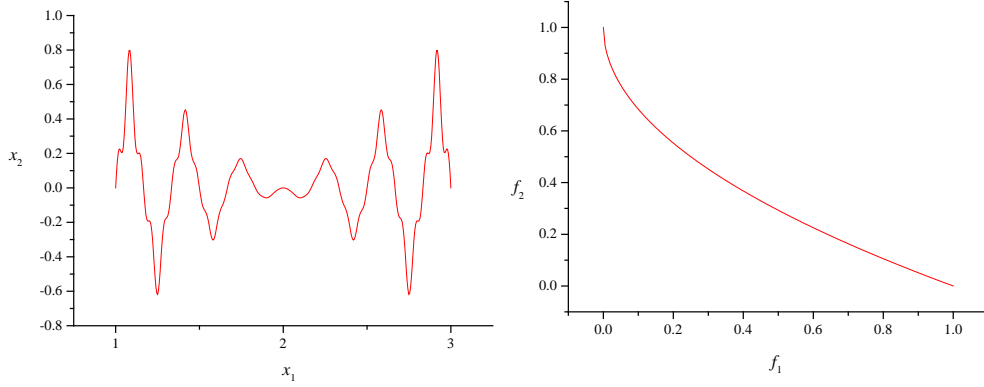

(a) True PSs of MMF7

(b) True PF of MMF7

Fig. 7. The true PSs and PF of MMF7.

### MMF8

$$\begin{cases} f_1 = \sin|x_1| \\ f_2 = \begin{cases} \sqrt{1 - (\sin|x_1|)^2} + 2(x_2 - \sin|x_1| - |x_1|)^2 & 0 \leq x_2 \leq 4 \\ \sqrt{1 - (\sin|x_1|)^2} + 2(x_2 - 4 - \sin|x_1| - |x_1|)^2 & 4 < x_2 \leq 9 \end{cases} \end{cases}$$

Its search space is

$$x_1 \in [-\pi, \pi], \quad x_2 \in [0, 9].$$

Its global PSs are

$$x_2 = \begin{cases} \sin|x_1| + |x_1| & 0 \leq x_2 \leq 4 \\ \sin|x_1| + |x_1| + 4 & 4 < x_2 \leq 9 \end{cases}$$

where  $-\pi \leq x_1 \leq \pi$ .

Its global PFs are

$$f_2 = 1 - \sqrt{f_1}$$

where  $0 \leq f_1 \leq 1$ .

Its true PSs and PF are illustrated in Fig. 8.

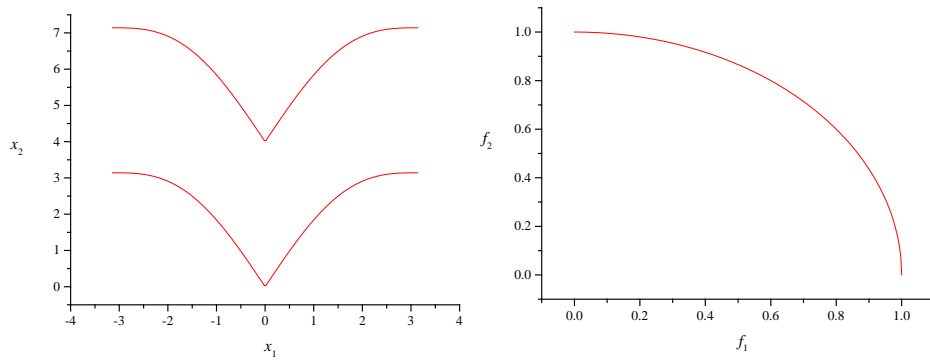

(a) True PSs of MMF8

(b) True PF of MMF8

Fig. 8. The true PSs and PF of MMF8.

**MMF10 / MMF10\_I**

$$\text{Min} \begin{cases} f_1 = x_1 \\ f_2 = \frac{g(x_2)}{x_1} \end{cases}$$

$$\text{where } g(x) = 2 - \exp\left[-\left(\frac{x-0.2}{0.004}\right)^2\right] - 0.8 \exp\left[-\left(\frac{x-0.6}{0.4}\right)^2\right].$$

Its search space is

$$x_1 \in [0.1, 1.1], \quad x_2 \in [0.1, 1.1].$$

Its global PS is

$$x_2 = 0.2, x_1 \in [0.1, 1.1].$$

Its local PS is

$$x_2 = 0.6, x_1 \in [0.1, 1.1].$$

Its global PF is

$$f_2 = \frac{g(0.2)}{f_1}, f_1 \in [0.1, 1.1].$$

Its local PF is

$$f_2 = \frac{g(0.6)}{f_1}, f_1 \in [0.1, 1.1].$$

Its true PSs and PFs are shown in Fig. 9.

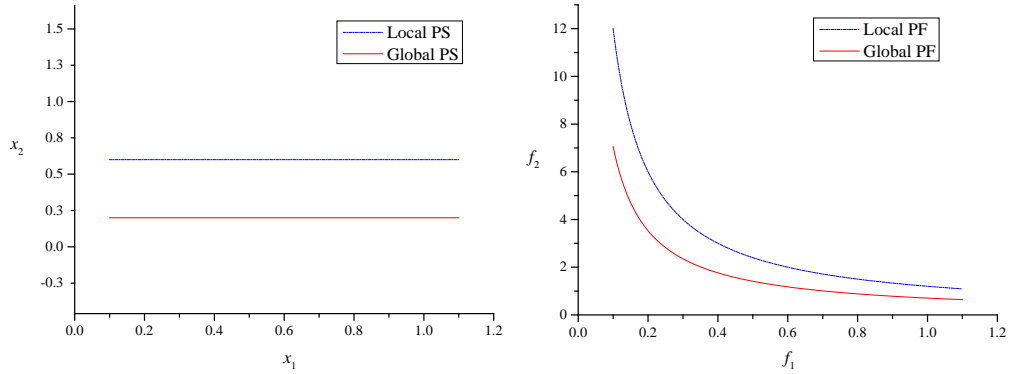

(a) True PSs of MMF10

(b) True PFs of MMF10

Fig. 9. The true PSs and PFs of MMF10.

**MMF11 / MMF11\_I**

$$\text{Min} \begin{cases} f_1 = x_1 \\ f_2 = \frac{g(x_2)}{x_1} \end{cases}$$

where  $g(x) = 2 - \exp\left[-2\log(2) \cdot \left(\frac{x-0.1}{0.8}\right)^2\right] \cdot \sin^6(n_p \pi x)$ ,  $n_p$  is the total number of

global and local PSs.

Its search space is

$$x_1 \in [0.1, 1.1], \quad x_2 \in [0.1, 1.1].$$

Its global PS is

$$x_2 = \frac{1}{2n_p}, \quad x_1 \in [0.1, 1.1].$$

Its  $i^{\text{th}}$  local PS is

$$x_2 = \frac{1}{2n_p} + \frac{1}{n_p} \cdot (i-1), \quad x_1 \in [0.1, 1.1]$$

where  $i = 2, 3, \dots, n_p$ .

Its global PF is

$$f_2 = \frac{g\left(\frac{1}{2n_p}\right)}{f_1}, \quad f_1 \in [0.1, 1.1].$$

Its local PF is

$$f_2 = \frac{g\left(\frac{1}{2n_p} + \frac{1}{n_p} \cdot (i-1)\right)}{f_1}, \quad f_1 \in [0.1, 1.1]$$

where  $i = 2, 3, \dots, n_p$ .

When  $n_p = 2$ , its true PSs and PFs are shown in Fig. 10.

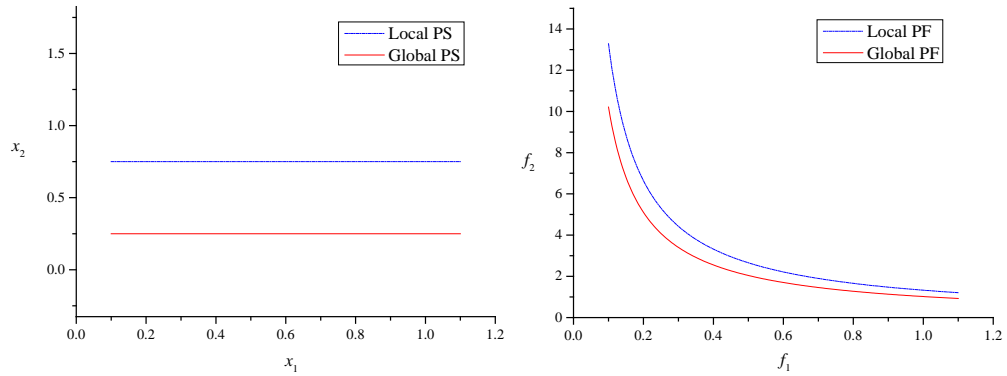

(a) True PSs of MMF11

(b) True PFs of MMF11

Fig. 10. The true PSs and PFs of MMF11.

## MMF12 / MMF12\_I

$$\text{Min} \begin{cases} f_1 = x_1 \\ f_2 = g(x_2) \cdot h(f_1, g) \end{cases}$$

where  $g(x) = 2 - \exp\left[-2 \log(2) \cdot \left(\frac{x-0.1}{0.8}\right)^2\right] \cdot \sin^6(n_p \pi x)$ ,  $n_p$  is the total number of

global and local PSs,  $h(f_1, g) = 1 - \left(\frac{f_1}{g}\right)^2 - \frac{f_1}{g} \sin(2\pi q f_1)$ ,  $q$  is the number of discontinuous

pieces in each PF (PS).

Its search space is

$$x_1 \in [0, 1], \quad x_2 \in [0, 1].$$

Its global PS is discontinuous pieces in

$$x_2 = \frac{1}{2n_p}.$$

Its  $i^{\text{th}}$  local PSs are discontinuous pieces in

$$x_2 = \frac{1}{2n_p} + \frac{1}{n_p} \cdot (i-1)$$

where  $i = 2, 3, \dots, n_p$ .

Its global PF is discontinuous pieces in

$$f_2 = g^* \cdot h(f_1, g^*)$$

where  $g^*$  is the global optimum of  $g(x)$ .

Its local PFs are discontinuous pieces in

$$f_2 = g_i^* \cdot h(f_1, g_i^*)$$

where  $g_i^*$  are the local optima of  $g(x)$ .

The ranges of discontinuous pieces depend on the minima of  $f_2 = g^* \cdot h(f_1, g^*)$ .

When  $n_p = 2$ , its true PSs and PFs are shown in Fig. 11.

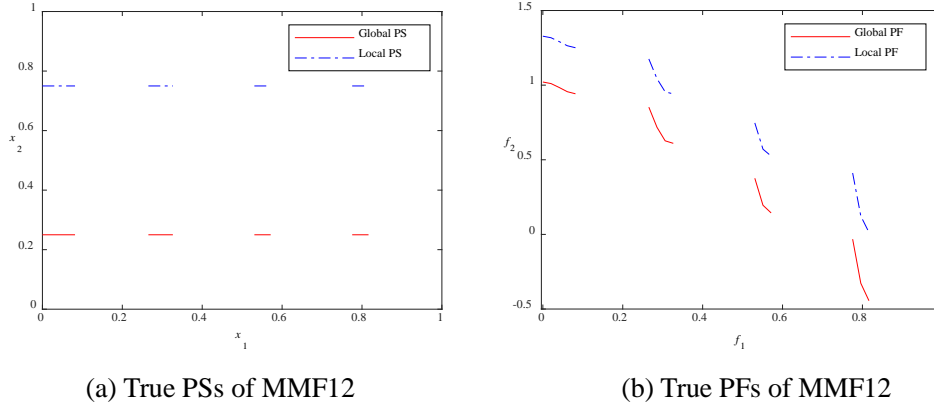

Fig. 11. The true PSs and PFs of MMF12.

### MMF13 / MMF13\_I

$$\min \begin{cases} f_1 = x_1 \\ f_2 = \frac{g(t)}{x_1} \end{cases}$$

where  $g(t) = 2 - \exp\left[-2\log(2) \cdot \left(\frac{t-0.1}{0.8}\right)^2\right] \cdot \sin^6(n_p \pi(t))$ ,

$t = x_2 + \sqrt{x_3}$ ,  $n_p$  is the total number of global and local PSs.

Its search space is

$$x_1 \in [0.1, 1.1], x_2 \in [0.1, 1.1], x_3 \in [0.1, 1.1].$$

Its global PS is

$$x_2 + \sqrt{x_3} = \frac{1}{2n_p}, x_1 \in [0.1, 1.1].$$

Its  $i^{\text{th}}$  local PSs is

$$x_2 + \sqrt{x_3} = \frac{1}{2n_p} + \frac{i-1}{n_p}, x_1 \in [0.1, 1.1].$$

where  $i = 2, 3, \dots, n_p$ .

Its global PF is

$$f_2 = \frac{2 - \exp\left[-2\log(2) \cdot \left(\frac{\frac{1}{2n_p} - 0.1}{0.8}\right)^2\right] \cdot \sin^6\left(n_p \pi \left(\frac{1}{2n_p}\right)\right)}{f_1}$$

Its local PFs are

$$f_2 = \frac{2 - \exp \left[ -2 \log(2) \cdot \left( \frac{\left( \frac{1}{2n_p} + \frac{i-1}{n_p} \right) - 0.1}{0.8} \right)^2 \right] \cdot \sin^6 \left( n_p \pi \left( \frac{1}{2n_p} + \frac{i-1}{n_p} \right) \right)}{f_1}$$

where  $i = 2, 3, \dots, n_p$ .

When  $n_p = 2$ , its true PSs and PFs are shown in Fig. 12.

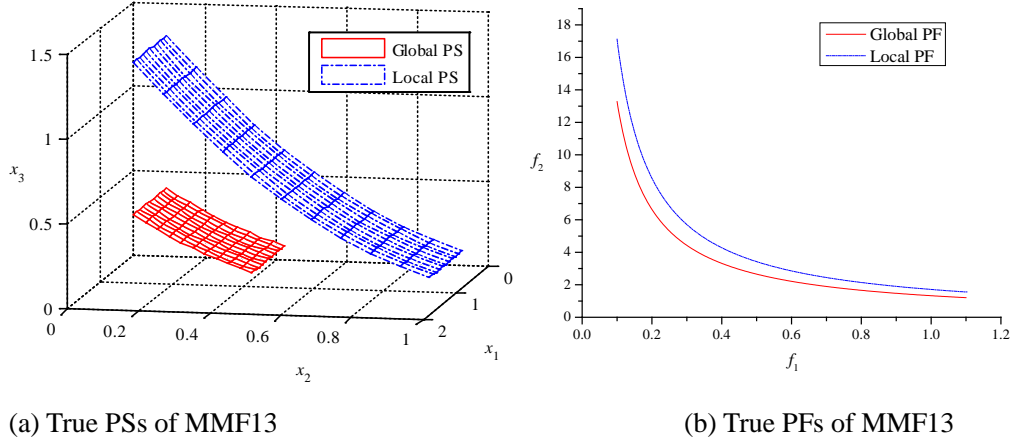

Fig. 12. The true PSs and PFs of MMF13.

#### MMF14

$$\text{Min} \begin{cases} f_1 = \cos(\pi/2 x_1) \cos(\pi/2 x_2) \cdots \cos(\pi/2 x_{m-2}) \cos(\pi/2 x_{m-1}) (1 + g(x_m, x_{m+1}, \dots, x_{m-1+k})) \\ f_2 = \cos(\pi/2 x_1) \cos(\pi/2 x_2) \cdots \cos(\pi/2 x_{m-2}) \sin(\pi/2 x_{m-1}) (1 + g(x_m, x_{m+1}, \dots, x_{m-1+k})) \\ f_3 = \cos(\pi/2 x_1) \cos(\pi/2 x_2) \cdots \sin(\pi/2 x_{m-2}) (1 + g(x_m, x_{m+1}, \dots, x_{m-1+k})) \\ \vdots \\ f_{m-1} = \cos(\pi/2 x_1) \sin(\pi/2 x_2) (1 + g(x_m, x_{m+1}, \dots, x_{m-1+k})) \\ f_m = \sin(\pi/2 x_1) (1 + g(x_m, x_{m+1}, \dots, x_{m-1+k})) \end{cases}$$

where  $g(x_m, x_{m+1}, \dots, x_{m-1+k}) = 2 - \sin^2 \left( n_p \pi \left( x_{\frac{m-1+k}{n_p}} \right) \right)$ ,  $n_p$  is the number of global PSs.

Its search space is

$$x_i \in [0, 1], \text{ for } i = 1, 2, \dots, n,$$

where  $n$  is the dimension of decision space;  $m$  is the dimension of objective space;

$$k = n - (m - 1).$$

Its  $i^{\text{th}}$  ( $i = 1, 2, \dots, n_p$ ) global PSs are

$$x_n = \frac{1}{2n_p} + \frac{1}{n_p} \cdot (i - 1), x_j \in [0, 1] \text{ for } j = 1 : n - 1.$$

Its global PFs are

$$\sum_{j=1}^M (f_j)^2 = (1 + g^*)^2$$

where  $g^*$  are the global optima of  $g(x)$ .

When  $n_p = 2, m = 2, n = 3$ , its true PSs and PFs are shown in Fig. 13.

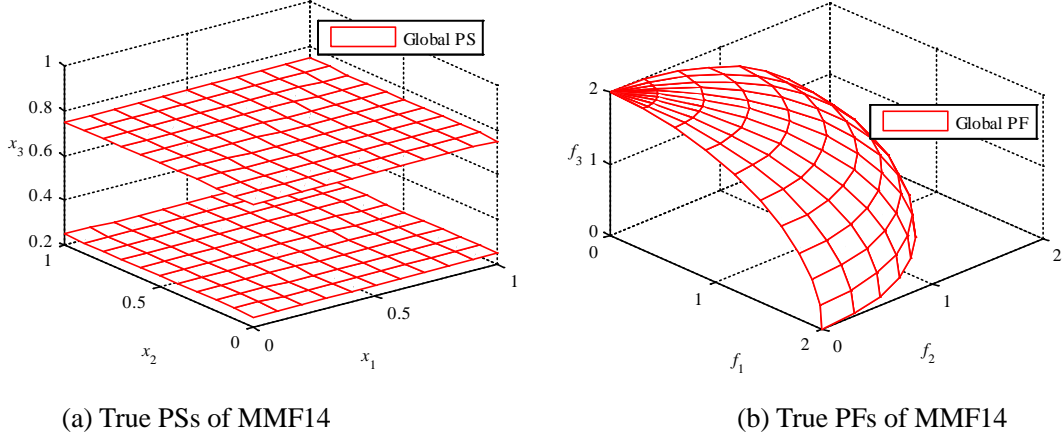

Fig. 13. The true PSs and PFs of MMF14.

#### MMF14\_a

$$\text{Min} \begin{cases} f_1 = \cos(\pi/2 x_1) \cos(\pi/2 x_2) \cdots \cos(\pi/2 x_{m-2}) \cos(\pi/2 x_{m-1}) (1 + g(x_m, x_{m+1}, \dots, x_{m-1+k})) \\ f_2 = \cos(\pi/2 x_1) \cos(\pi/2 x_2) \cdots \cos(\pi/2 x_{m-2}) \sin(\pi/2 x_{m-1}) (1 + g(x_m, x_{m+1}, \dots, x_{m-1+k})) \\ f_3 = \cos(\pi/2 x_1) \cos(\pi/2 x_2) \cdots \sin(\pi/2 x_{m-2}) (1 + g(x_m, x_{m+1}, \dots, x_{m-1+k})) \\ \vdots \\ f_{m-1} = \cos(\pi/2 x_1) \sin(\pi/2 x_2) (1 + g(x_m, x_{m+1}, \dots, x_{m-1+k})) \\ f_m = \sin(\pi/2 x_1) (1 + g(x_m, x_{m+1}, \dots, x_{m-1+k})) \end{cases}$$

where  $g(x_m, x_{m+1}, \dots, x_{m-1+k}) = 2 - \sin^2 \left( n_p \pi \left( x_{m-1+k} - 0.5 \sin(\pi x_{m-2+k}) + \frac{1}{2n_p} \right) \right)$ ,  $n_p$  is the number of global PSs.

Its search space is

$$x_i \in [0, 1], \text{ for } i = 1, 2, \dots, n$$

where  $n$  is the dimension of decision space;  $m$  is the dimension of objective space  
 $k = n - (m - 1)$ .

Its  $i^{\text{th}}$  ( $i = 1, 2, \dots, n_p$ ) global PSs are

$$x_n = 0.5 \sin(\pi x_{n-1}) + \frac{1}{n_p} \cdot (i - 1), x_j \in [0, 1] \text{ for } j = 1 : n - 1.$$

Its global PFs are

$$\sum_{j=1}^M (f_j)^2 = (1 + g^*)^2$$

where  $g^*$  are the global optima of  $g(x)$ .

When  $n_p = 2, m = 2, n = 3$ , its true PSs and PFs are shown in Fig. 14.



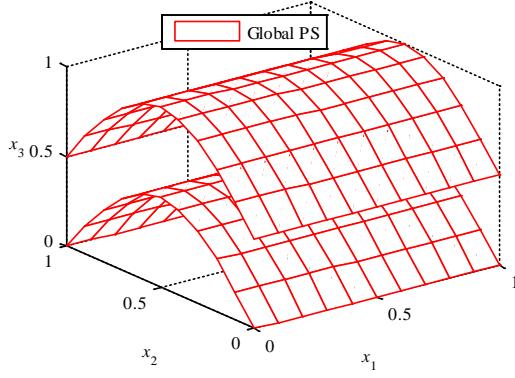

(a) True PSs of MMF14\_a

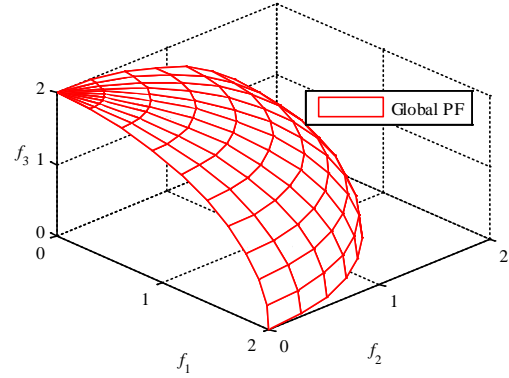

(b) True PFs of MMF14\_a

Fig. 14. The true PSs and PFs of MMF14\_a.

### MMF15 / MMF15\_l

$$\text{Min} \begin{cases} f_1 = \cos(\pi/2 x_1) \cos(\pi/2 x_2) \cdots \cos(\pi/2 x_{m-2}) \cos(\pi/2 x_{m-1}) (1 + g(x_m, x_{m+1}, \dots, x_{m-1+k})) \\ f_2 = \cos(\pi/2 x_1) \cos(\pi/2 x_2) \cdots \cos(\pi/2 x_{m-2}) \sin(\pi/2 x_{m-1}) (1 + g(x_m, x_{m+1}, \dots, x_{m-1+k})) \\ f_3 = \cos(\pi/2 x_1) \cos(\pi/2 x_2) \cdots \sin(\pi/2 x_{m-2}) (1 + g(x_m, x_{m+1}, \dots, x_{m-1+k})) \\ \vdots \\ f_{m-1} = \cos(\pi/2 x_1) \sin(\pi/2 x_2) (1 + g(x_m, x_{m+1}, \dots, x_{m-1+k})) \\ f_m = \sin(\pi/2 x_1) (1 + g(x_m, x_{m+1}, \dots, x_{m-1+k})) \end{cases}$$

where  $g(x_m, x_{m+1}, \dots, x_{m-1+k}) = 2 - \exp \left[ -2 \log(2) \cdot \left( \frac{x_{m-1+k} - 0.1}{0.8} \right)^2 \right] \cdot \sin^2(n_p \pi x_{m-1+k})$ ,  $n_p$  is the

number of global PSs.

Its search space is

$$x_i \in [0, 1], \text{ for } i = 1, 2, \dots, n,$$

where  $n$  is the dimension of decision space;  $m$  is the dimension of objective space;

$$k = n - (m - 1).$$

Its global PS is

$$x_n = \frac{1}{2n_p}, x_j \in [0, 1] \text{ for } j = 1 : n - 1.$$

Its  $i^{\text{th}}$  ( $i = 2, 3, \dots, n_p$ ) local PSs are

$$x_n = \frac{1}{2n_p} + \frac{1}{n_p} \cdot (i - 1), x_j \in [0, 1] \text{ for } j = 1 : n - 1.$$

Its global PF is

$$\sum_{j=1}^M (f_j)^2 = (1 + g^*)^2$$

where  $g^*$  is the global optimum of  $g(x)$ .

Its  $i^{\text{th}}$  local PFs are

$$\sum_{j=1}^M (f_j)^2 = (1 + g_i^*)^2$$

where  $g_i^*$  are the local optima of  $g(x)$ .

When  $n_p = 2, m = 2, n = 3$ , its true PSs and PFs are shown in Fig. 15.

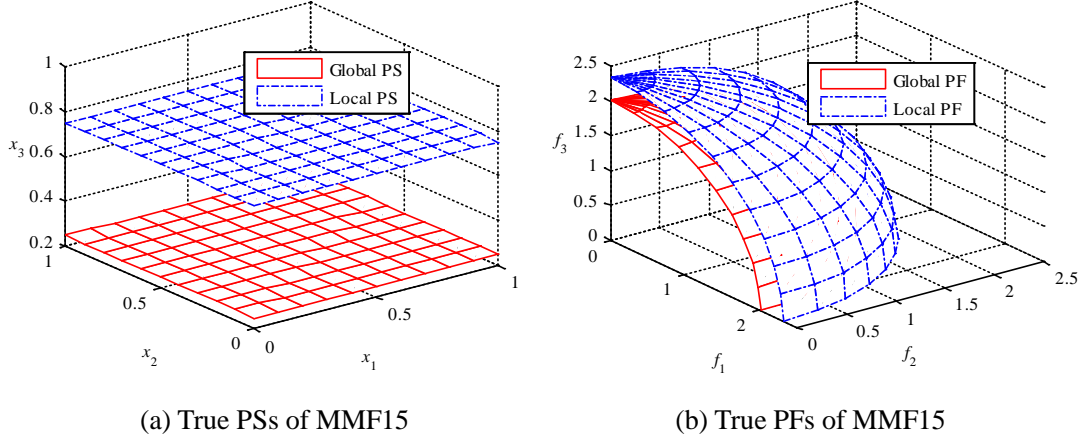

Fig. 15. The true PSs and PFs of MMF15.

**MMF15\_a / MMF15\_a\_l**

$$\text{Min} \begin{cases} f_1 = \cos(\pi/2 x_1) \cos(\pi/2 x_2) \cdots \cos(\pi/2 x_{m-2}) \cos(\pi/2 x_{m-1}) (1 + g(x_m, x_{m+1}, \dots, x_{m-1+k})) \\ f_2 = \cos(\pi/2 x_1) \cos(\pi/2 x_2) \cdots \cos(\pi/2 x_{m-2}) \sin(\pi/2 x_{m-1}) (1 + g(x_m, x_{m+1}, \dots, x_{m-1+k})) \\ f_3 = \cos(\pi/2 x_1) \cos(\pi/2 x_2) \cdots \sin(\pi/2 x_{m-2}) (1 + g(x_m, x_{m+1}, \dots, x_{m-1+k})) \\ \vdots \\ f_{m-1} = \cos(\pi/2 x_1) \sin(\pi/2 x_2) (1 + g(x_m, x_{m+1}, \dots, x_{m-1+k})) \\ f_m = \sin(\pi/2 x_1) (1 + g(x_m, x_{m+1}, \dots, x_{m-1+k})) \end{cases}$$

where  $g(x_m, x_{m+1}, \dots, x_{m-1+k}) = 2 - \exp \left[ -2 \log(2) \cdot \left( \frac{t-0.1}{0.8} \right)^2 \right] \cdot \sin^2(n_p \pi t)$ ,

$t = x_{m-1+k} - 0.5 \sin(\pi x_{m-2+k}) + \frac{1}{2n_p}$ ,  $n_p$  is the number of global PSs.

Its search space is

$$x_i \in [0, 1], \text{ for } i = 1, 2, \dots, n$$

where  $n$  is the dimension of decision space;  $m$  is the dimension of objective space;  $k = n - (m - 1)$ .

Its global PS is

$$x_n = 0.5 \sin(\pi x_{n-1}), x_j \in [0, 1] \text{ for } j = 1 : n - 1.$$

Its  $i^{\text{th}}$  ( $i = 2, 3, \dots, n_p$ ) local PSs are

$$x_n = 0.5 \sin(\pi x_{n-1}) + \frac{1}{n_p} (i - 1), x_j \in [0, 1] \text{ for } j = 1 : n - 1.$$

Its global PF is

$$\sum_{j=1}^M (f_j)^2 = (1 + g^*)^2$$

where  $g^*$  is the global optimum of  $g(x)$ .

Its  $i^{\text{th}}$  local PFs are

$$\sum_{j=1}^M (f_j)^2 = (1 + g_i^*)^2$$

where  $g_i^*$  are the local optima of  $g(x)$ .

When  $n_p = 2, m = 2, n = 3$ , its true PSs and PFs are shown in Fig. 16.

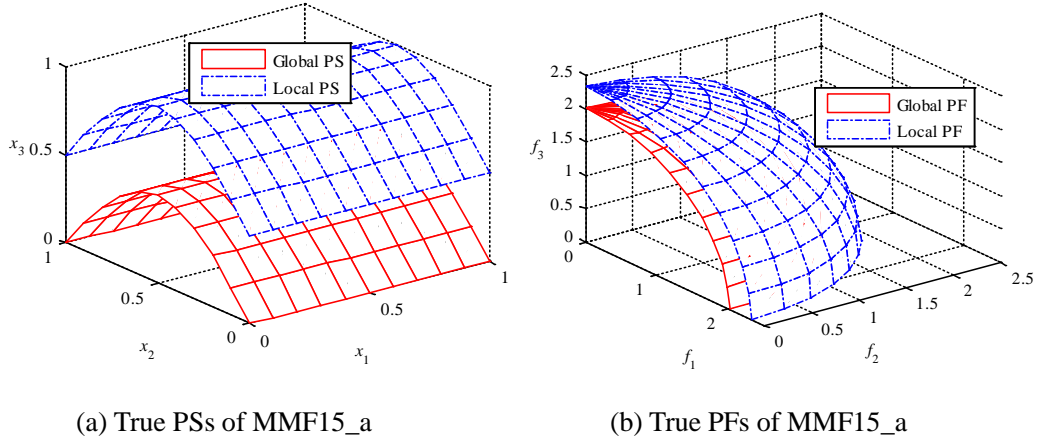

Fig. 16. The true PSs and PFs of MMF15\_a.

## MMF16

$$\text{Min} \begin{cases} f_1 = \cos(\pi/2 x_1) \cos(\pi/2 x_2) \cdots \cos(\pi/2 x_{m-2}) \cos(\pi/2 x_{m-1}) (1 + g(x_m, x_{m+1}, \dots, x_{m-1+k})) \\ f_2 = \cos(\pi/2 x_1) \cos(\pi/2 x_2) \cdots \cos(\pi/2 x_{m-2}) \sin(\pi/2 x_{m-1}) (1 + g(x_m, x_{m+1}, \dots, x_{m-1+k})) \\ f_3 = \cos(\pi/2 x_1) \cos(\pi/2 x_2) \cdots \sin(\pi/2 x_{m-2}) (1 + g(x_m, x_{m+1}, \dots, x_{m-1+k})) \\ \vdots \\ f_{m-1} = \cos(\pi/2 x_1) \sin(\pi/2 x_2) (1 + g(x_m, x_{m+1}, \dots, x_{m-1+k})) \\ f_m = \sin(\pi/2 x_1) (1 + g(x_m, x_{m+1}, \dots, x_{m-1+k})) \end{cases}$$

where

$$g(x_m, x_{m+1}, \dots, x_{m-1+k}) = \begin{cases} 2 - \sin^2(2n_{p-g}\pi(x_{m-1+k})) & 0 \leq x_{m-1+k} < 0.5 \\ 2 - \exp\left[-2\log(2) \cdot \left(\frac{x_{m-1+k} - 0.1}{0.8}\right)^2\right] \cdot \sin^2(2n_{p-l}\pi x_{m-1+k}) & 0.5 \leq x_{m-1+k} \leq 1 \end{cases},$$

$n_{p-g}$  is the number of global PSs and  $n_{p-l}$  is the number of local PSs.

Its search space is

$$x_i \in [0, 1], \text{ for } i = 1, 2, \dots, n,$$

where  $n$  is the dimension of decision space;  $m$  is the dimension of objective space;  $k = n - (m - 1)$ .

Its  $i^{\text{th}}$  ( $i = 1, 2, \dots, \frac{n_p}{2}$ ) global PS is

$$x_n = \frac{1}{2n_p} + \frac{1}{n_p} \cdot (i-1), x_j \in [0, 0.5] \text{ for } j = 1 : n-1$$

Its  $i^{\text{th}}$  ( $i = 1, 2 \dots \frac{n_p}{2}$ ) local PSs are

$$x_n = \frac{1}{2n_p} + \frac{1}{n_p} \cdot (i-1), x_j \in [0.5, 1] \text{ for } j = 1 : n-1.$$

Its global PFs are

$$\sum_{j=1}^M (f_j)^2 = (1 + g^*)^2$$

where  $g^*$  are the global optima of  $g(x)$ .

Its local PFs are

$$\sum_{j=1}^M (f_j)^2 = (1 + g_i^*)^2$$

where  $g_i^*$  are the local optima of  $g(x)$ .

When  $n_p = 4, m = 2, n = 3$ , its true PSs and PFs are shown in

### MMF16\_l1

Test function is the same with MMF16. The parameters are set as:

$$n_{p-g} = 2, n_{p-l} = 1, m = 2, n = 3,$$

Its true PSs and PFs are shown in Fig. 17.

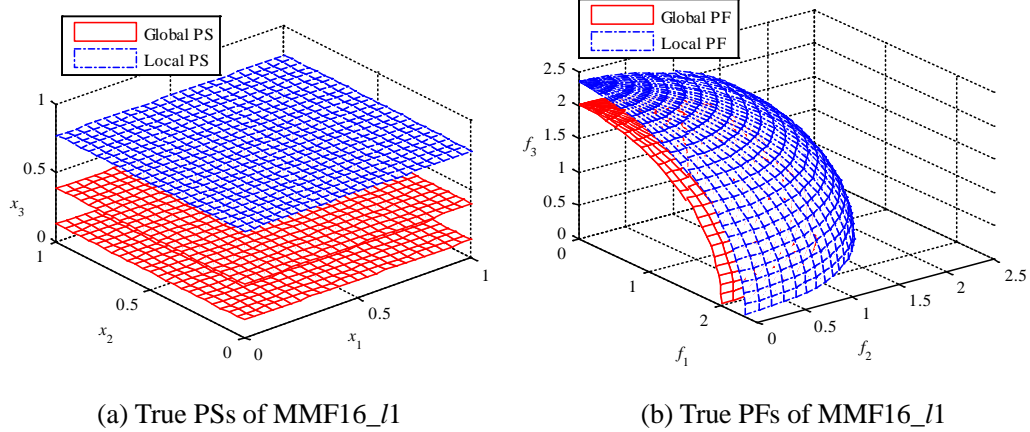

Fig. 17. The true PSs and PFs of MMF16\_l1.

### MMF16\_l2

Test function is the same with MMF16. The parameters are set as:

$$n_{p-g} = 1, n_{p-l} = 2, m = 2, n = 3,$$

Its true PSs and PFs are shown in Fig. 18.

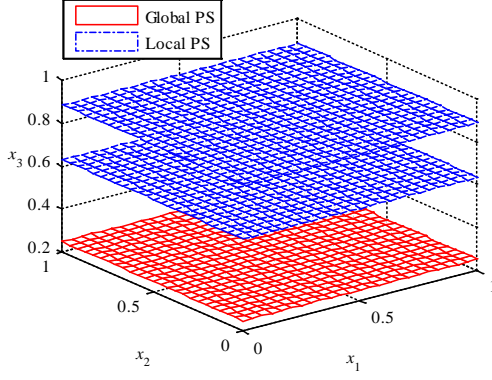

(a) True PSs of MMF16\_I2

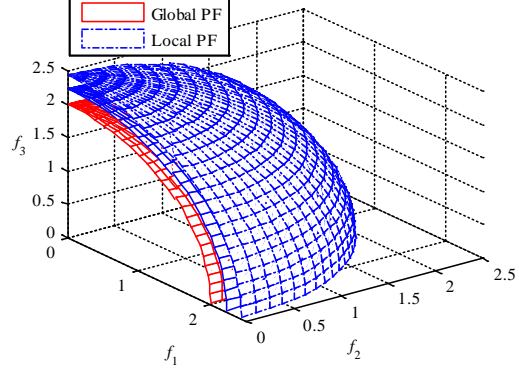

(b) True PFs of MMF16\_I2

Fig. 18. The true PSs and PFs of MMF16\_I2.

### MMF16\_I3

Test function is the same with MMF16. The parameters are set as:

$$n_{p-g} = 2, n_{p-l} = 2, m = 2, n = 3,$$

Its true PSs and PFs are shown in Fig. 19.

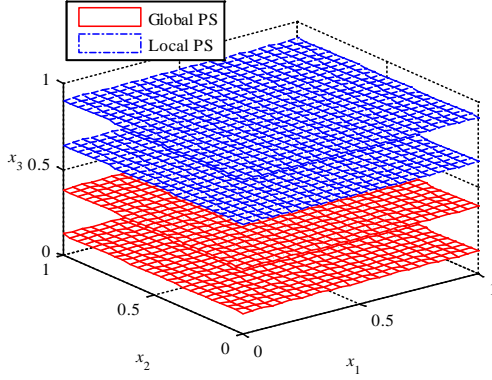

(a) True PSs of MMF16\_I3

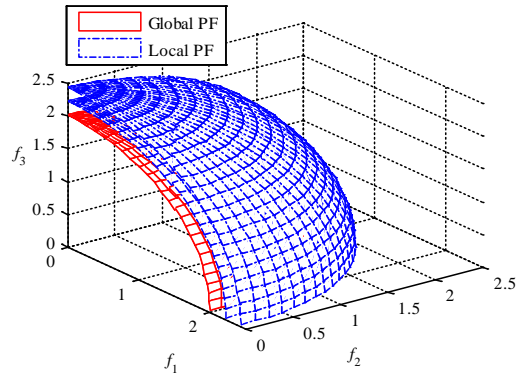

(b) True PFs of MMF16\_I3

Fig. 19. The true PSs and PFs of MMF16\_I3.

## 2 Evaluation criteria

### 2.1 Performance indicators

Four performance indicators, the reciprocal of Pareto Sets Proximity ( $1/PSP$ ) [3], Inverted Generational Distance ( $IGD$  [12]) in decision space ( $IGDX$  [13], the reciprocal of Hypervolume ( $1/HV$ ) [14], and  $IGD$  in objective space ( $IGDF$ ) [13] are employed to compare the performances of different algorithms. Among the indicators,  $1/PSP$  and  $IGDX$  are used to compare the performance in decision space, while  $1/HV$  and  $IGDF$  are used to compare the performance in objective space. The reference data including reference PFs, PSs and reference points of  $HV$  are available on <http://www5.zzu.edu.cn/ecilab/info/1036/1163.htm>. For all the four indicators, the smaller value means the better performance.

## 2.2 Performance comparison method

Algorithms are ranked through the Friedman of  $k$  algorithms over  $N$  case problems. Each algorithm is assigned four ranks according to the four indicators ( $1/PSP$ ,  $IGDX$ ,  $1/HV$  and  $IGDF$ ). The mean value of the four ranks acts as the final score. The algorithm with the smallest score ranks first.

## 2.3 Experimental setting

Running times: 21 times

Population size:  $200 * N_{ops}$

Maximal fitness evaluations (MaxFES):  $10000 * N_{ops}$

where  $N_{var}$  represents the number of variables and  $N_{ops}$  means the number of local and global PS to be obtained.

## 3 Results Format

Provide the best, worst, mean, median, and standard deviation values of each indicator value for the 21 runs.

The participants are required to send the final results as the following format to the organizers and the organizers will present an overall analysis and comparison based on these results.

Create one txt document with the name “AlgorithmName \_IndicatorName.txt” for each indicator.

For example, the reciprocal of  $PSP$  of MO\_Ring\_PSO\_SCD for test function MMF1, the file name should be “MO\_Ring\_PSO\_SCD\_rPSP.txt”.

Then save the results matrix (the gray shadowing part  $24 * 26$ ) as Table II-Table V in the file:

Table II. Information matrix for  $1/PSP$

| ***.txt  | Run1 | Run2 | ... | Run21 | Best | Worst | Mean | Median | Standard deviation |
|----------|------|------|-----|-------|------|-------|------|--------|--------------------|
| MMF1     |      |      |     |       |      |       |      |        |                    |
| MMF2     |      |      |     |       |      |       |      |        |                    |
| MMF4     |      |      |     |       |      |       |      |        |                    |
| MMF5     |      |      |     |       |      |       |      |        |                    |
| ...      |      |      |     |       |      |       |      |        |                    |
| MMF16_I3 |      |      |     |       |      |       |      |        |                    |

Table III. Information matrix for  $1/HV$

| ***.txt  | Run 1 | Run2 | ... | Run21 | Best | Worst | Mean | Median | Standard deviation |
|----------|-------|------|-----|-------|------|-------|------|--------|--------------------|
| MMF1     |       |      |     |       |      |       |      |        |                    |
| MMF2     |       |      |     |       |      |       |      |        |                    |
| MMF4     |       |      |     |       |      |       |      |        |                    |
| MMF5     |       |      |     |       |      |       |      |        |                    |
| ...      |       |      |     |       |      |       |      |        |                    |
| MMF16_I3 |       |      |     |       |      |       |      |        |                    |

Table IV. Information matrix for  $IGDX$

| ***.txt | Run1 | Run2 | ... | Run21 | Best | Worst | Mean | Median | Standard deviation |
|---------|------|------|-----|-------|------|-------|------|--------|--------------------|
|---------|------|------|-----|-------|------|-------|------|--------|--------------------|

|          |  |  |  |  |  |  |  |  |  |
|----------|--|--|--|--|--|--|--|--|--|
| MMF1     |  |  |  |  |  |  |  |  |  |
| MMF2     |  |  |  |  |  |  |  |  |  |
| MMF4     |  |  |  |  |  |  |  |  |  |
| MMF5     |  |  |  |  |  |  |  |  |  |
| ...      |  |  |  |  |  |  |  |  |  |
| MMF16_13 |  |  |  |  |  |  |  |  |  |

Table V. Information matrix for *IGDF*

| ***.txt  | Run1 | Run2 | ... | Run21 | Best | Worst | Mean | Median | Standard deviation |
|----------|------|------|-----|-------|------|-------|------|--------|--------------------|
| MMF1     |      |      |     |       |      |       |      |        |                    |
| MMF2     |      |      |     |       |      |       |      |        |                    |
| MMF4     |      |      |     |       |      |       |      |        |                    |
| MMF5     |      |      |     |       |      |       |      |        |                    |
| ...      |      |      |     |       |      |       |      |        |                    |
| MMF16_13 |      |      |     |       |      |       |      |        |                    |

## References

- [1] K. Deb, "Multi-Objective Genetic Algorithms: Problem Difficulties and Construction of Test Problems," *Evolutionary Computation*, vol. 7, no. 3, pp. 205-230, 1999.
- [2] J. J. Liang, C. T. Yue, and B. Y. Qu, "Multimodal multi-objective optimization: A preliminary study," in *IEEE Congress on Evolutionary Computation*, Vancouver, 2016, pp. 2454-2461: IEEE, 2016.
- [3] C. T. Yue, B. Y. Qu, and J. J. Liang, "A multiobjective particle swarm optimizer using ring topology for solving multimodal multiobjective problems," *IEEE Transactions on Evolutionary Computation*, vol. 22, no. 5, pp. 805-817, 2018.
- [4] J. J. Liang, Q. Q. Guo, C. T. Yue, B. Y. Qu, and K. J. Yu, "A Self-organizing Multi-objective Particle Swarm Optimization Algorithm for Multimodal Multi-objective Problems," in *International Conference on Swarm Intelligence*, 2018, pp. 550-560: Springer.
- [5] Y. Liu, G. G. Yen, and D. Gong, "A Multi-Modal Multi-Objective Evolutionary Algorithm Using Two-Archive and Recombination Strategies," *IEEE Transactions on Evolutionary Computation*, vol. 23, no. 4, pp. 660-674, 2018.
- [6] R. Tanabe and H. Ishibuchi, "A Decomposition-Based Evolutionary Algorithm for Multi-modal Multi-objective Optimization," in *International Conference on Parallel Problem Solving from Nature*, Coimbra, 2018, pp. 249-261: Springer.
- [7] T. Tušar and B. Filipič, "Visualization of Pareto front approximations in evolutionary multiobjective optimization: A critical review and the prosecution method," *IEEE Transactions on Evolutionary Computation*, vol. 19, no. 2, pp. 225-245, 2015.
- [8] P. Kerschke and C. Grimme, "An Expedition to Multimodal Multi-objective Optimization Landscapes," in *International Conference on Evolutionary Multi-Criterion Optimization*, 2017, pp. 329-343: Springer.
- [9] Y. Liu, H. Ishibuchi, and Y. Nojima, "A Double-Niched Evolutionary Algorithm and its

- Behavior on Polygon-Based Problems," in *International Conference on Parallel Problem Solving from Nature*, 2018, pp. 262-273.
- [10] C. T. Yue, J. J. Liang, B. Y. Qu, K. J. Yu, and H. Song, "Multimodal Multiobjective Optimization in Feature Selection," in *IEEE Congress on Evolutionary Computation*, 2019, pp. 302-309.
  - [11] C. T. Yue, B. Y. Qu, K. J. Yu, J. J. Liang, and X. Li, "A Novel Scalable Test Problem Suite for Multimodal Multiobjective Optimization," *Swarm and Evolutionary Computation*, vol. 48, no. 2019, pp. 62-71, 2019.
  - [12] Q. Zhang, A. Zhou, and Y. Jin, "RM-MEDA: A Regularity Model-Based Multiobjective Estimation of Distribution Algorithm," *IEEE Transactions on Evolutionary Computation*, vol. 12, no. 1, pp. 41-63, 2008.
  - [13] A. Zhou, Q. Zhang, and Y. Jin, "Approximating the Set of Pareto-Optimal Solutions in Both the Decision and Objective Spaces by an Estimation of Distribution Algorithm," *IEEE Transactions on Evolutionary Computation*, vol. 13, no. 5, pp. 1167-1189, 2009.
  - [14] E. Zitzler, L. Thiele, M. Laumanns, C. M. Fonseca, and V. G. D. Fonseca, "Performance assessment of multiobjective optimizers: an analysis and review," *IEEE Transactions on Evolutionary Computation*, vol. 7, no. 2, pp. 117-132, 2003.
