# Supplementary material for: An improved termite life cycle optimizer algorithm for global function optimization
Source: PeerJ journal article supplement (doi:10.7717/peerj-cs.2671), 2025-02-17
Supplement: Date.7z [file Date.7z]

## Sheet: ITLCO1
ITLCO1	30D	the new worker generation strategy with Sect. 3.1 removed from ITLCO
	ITLCO	ITLCO1	ITLCO1	ITLCO1	ITLCO1 are executed autonomously for a total of 30 iterations on each test function
function	mean	mean	Optimal value	standard deviation	1	2	3	4	5	6	7	8	9	10	11	12	13	14	15	16	17	18	19	20	21	22	23	24	25	26	27	28	29	30
F1	0	1.65139e-24	1.5569e-26	2.57115e-24	5.30676e-25	5.01428e-24	5.90138e-25	5.38626e-25	1.04511e-23	5.58136e-24	3.25109e-25	1.72756e-24	9.07442e-26	5.86565e-26	2.05238e-26	1.5569e-26	3.63034e-26	1.50108e-25	5.0454e-25	1.68848e-24	5.9518e-25	8.56445e-25	7.12941e-26	9.8371e-25	9.1546e-24	2.56446e-25	1.82289e-24	4.47726e-25	9.72733e-25	3.81209e-26	1.8634e-24	9.67283e-25	7.00865e-25	3.48733e-24
F2	773000	4.80311e+06	1.04789e+06	2.81335e+06	3.45931e+06	6.06126e+06	3.35802e+06	3.15941e+06	1.04789e+06	1.94219e+06	4.11255e+06	6.75743e+06	7.36342e+06	9.08435e+06	4.49662e+06	2.34822e+06	8.93348e+06	4.99412e+06	3.80485e+06	3.85612e+06	9.31431e+06	1.07776e+07	1.83443e+06	1.52569e+06	2.07817e+06	2.75096e+06	3.72063e+06	2.49638e+06	4.35286e+06	2.29438e+06	1.19448e+07	4.97384e+06	5.42063e+06	5.82947e+06
F3	0	0	0	0	0	0	0	0	0	0	0	0	0	0	0	0	0	0	0	0	0	0	0	0	0	0	0	0	0	0	0	0	0	0
F4	9150	17967.7	8005.29	4878.36	23882.8	20207	14850	20279	22794.4	21337.9	25113.8	19202.1	10295.6	18862.5	12038	10431.7	11795.9	16379.6	19171.4	18339.2	14162.2	13748.4	15200.6	14191.9	16541.4	19682.9	15766.3	22151.7	29412.7	17490.3	21706.7	23800.8	22190.1	8005.29
F5	0	5.10737e-14	5.06174e-15	4.77446e-14	2.57392e-13	1.55055e-14	5.06174e-15	4.30742e-14	2.21819e-14	3.98225e-14	6.23514e-14	1.01656e-13	7.96986e-14	2.33289e-14	1.85723e-14	1.91737e-14	2.4168e-14	4.80033e-14	1.56679e-14	6.95204e-14	4.02354e-14	5.76897e-14	7.00579e-14	6.42781e-14	6.46368e-15	4.7418e-14	6.5735e-14	9.81706e-14	2.61068e-14	4.24699e-14	2.97089e-14	7.33408e-15	1.11011e-13	2.03537e-14
F6	13.6	48.4097	0.0139797	26.8849	70.9997	26.6268	72.9882	81.7633	68.4001	41.9877	26.4462	71.5205	15.5027	67.8238	78.138	72.6297	15.3037	71.5781	42.8896	16.3916	13.7243	66.7452	68.7505	66.4988	26.7977	15.674	0.0139797	74.3685	72.8841	16.5171	15.1155	77.4805	75.7692	20.9618
F7	0	0	0	0	0	0	0	0	0	0	0	0	0	0	0	0	0	0	0	0	0	0	0	0	0	0	0	0	0	0	0	0	0	0
F8	21	20.9877	20.8711	0.0523847	20.9126	21.0209	20.9681	20.9963	21.0007	20.9798	21.0238	20.9642	20.9861	20.9537	21.0982	21.0088	20.9398	21.0329	21.0349	21.0404	20.9482	20.97	21.0551	20.9815	20.8714	20.8711	20.9718	20.9243	21.0108	21.0039	20.9852	20.9634	21.0807	21.0324
F9	0	0	0	0	0	0	0	0	0	0	0	0	0	0	0	0	0	0	0	0	0	0	0	0	0	0	0	0	0	0	0	0	0	0
F10	0.0755	0.0913471	0.00739953	0.0706892	0.159865	0.0961255	0.0122205	0.00745853	0.0742011	0.199146	0.0221931	0.0295524	0.0517799	0.160156	0.14016	0.0985498	0.113342	0.138175	0.0199841	0.0738943	0.0369459	0.275854	0.0887239	0.21907	0.035072	0.0935476	0.00739953	0.0295633	0.10848	0.216789	0.0161194	0.0682281	0.120699	0.0271161
F11	0	0	0	0	0	0	0	0	0	0	0	0	0	0	0	0	0	0	0	0	0	0	0	0	0	0	0	0	0	0	0	0	0	0
F12	0	14.8404	0	44.609	150.541	0	0	0	0	158.014	0	0	0	0	0	0	0	0	0	0	0	0	0	0	0	0	0	0	0	0	0	0	136.657	0
F13	0	0	0	0	0	0	0	0	0	0	0	0	0	0	0	0	0	0	0	0	0	0	0	0	0	0	0	0	0	0	0	0	0	0
F14	909	699.912	224.811	249.554	1159.42	685.138	592.605	540.156	805.757	1065.31	829.714	551.236	671.033	788.643	785.955	542.108	346.141	718.352	535.426	697.656	224.811	531.141	376.368	1153.38	830.583	560.974	591.502	474.176	553.453	423.774	940.96	1142.79	1176.48	702.314
F15	4270	4321.47	3037.59	650.614	3977.73	4510.3	3728.04	3037.59	4489.25	4094.4	5067.8	4044.33	4915.83	3637.73	3247.61	3379.2	4276.62	5120.91	4921.83	3783.19	4969.4	4565.93	4238.4	3937.77	4058.05	3658.88	4299.84	5412.94	5413.12	4406.1	4236.65	4758.84	5626.91	3828.96
F16	1.49	1.50596	0.725097	0.519608	2.25855	1.15441	1.40677	1.30427	1.05804	1.06571	1.24172	2.28428	2.66222	1.42691	2.27796	1.46585	2.01125	2.0862	1.3073	1.19024	1.35445	1.23759	2.50851	1.39481	2.16537	1.18613	0.725097	0.902645	0.788959	1.10536	1.68183	1.45312	1.50193	0.971441
F17	38.1	46.2695	19.1213	11.8272	44.2399	39.328	67.8012	48.3132	34.6116	36.9287	35.7864	40.5478	47.2093	45.2052	36.5295	49.871	77.3271	49.3218	37.2751	37.0531	51.8312	70.0938	46.5034	39.6245	40.796	63.6571	37.1275	49.5067	48.7613	19.1213	44.0061	45.8938	42.4235	61.3895
F18	99.1	130.37	71.1735	37.9626	84.071	105.171	103.813	71.1735	77.6788	86.1544	206.535	138.369	91.5001	177.423	75.8559	175.317	153.762	125.506	155.458	214.355	157.239	139.693	116.53	111.271	150.24	81.3796	160.271	120.405	153.461	143.067	136.323	91.8087	164.291	142.97
F19	5.63	8.30222	4.50873	2.28917	7.00357	11.7881	7.12157	10.4574	5.83626	11.7536	7.49817	11.3112	6.12039	9.79032	9.60402	7.27303	5.5503	9.85022	8.41169	6.68697	5.06585	11.5411	10.1892	5.01939	10.6925	4.50873	11.5395	7.41899	7.08811	7.53116	8.65104	5.05011	7.67451	11.0395
F20	0	2.67072	0	3.81617	0	0	9.00286	7.87339	0	0	7.15914	8.95848	0	6.14439	0	0	8.36816	0	0	0	7.76438	7.35526	0	0	0	9.49467	0	0	0	0	0	0	0	8.0009
F21	400	400	400	5.27961e-13	400	400	400	400	400	400	400	400	400	400	400	400	400	400	400	400	400	400	400	400	400	400	400	400	400	400	400	400	400	400
F22	871	564.561	82.4827	317.052	343.734	877.806	201.563	952.832	240.389	349.311	495.443	330.912	786.311	903.8	607.659	161.626	796.267	543.313	1186.66	488.777	696.341	692.692	726.703	589.635	1583.97	432.703	218.55	82.4827	516.556	501.839	442.18	517.501	306.886	362.393
F23	4850	4735.95	2942.95	791.183	4386.33	3290.74	4525.99	2942.95	5278.52	4783.64	4855.41	4385.53	4357.38	5220.44	5400.31	5348.04	6249	5013.52	3947.83	3664.31	4835.18	5633.92	4971.09	5114.59	5905.51	4606.45	4647.26	4114.34	4985.2	3770.19	5803.99	4874.83	5712.14	3453.74
F24	200	200.317	200.24	0.0457856	200.35	200.282	200.335	200.286	200.324	200.326	200.31	200.474	200.24	200.37	200.295	200.358	200.348	200.281	200.341	200.285	200.285	200.254	200.305	200.397	200.301	200.297	200.303	200.281	200.3	200.263	200.319	200.302	200.337	200.366
F25	232	254.173	218.847	38.9027	292.604	220.257	223.66	289.273	314.267	226.804	284.979	305.986	226.05	222.325	220.041	288.63	219.78	219.691	222.046	226.333	329.545	218.847	224.578	301.114	225.96	310.218	224.129	223.512	295.95	297.35	225.797	224.937	220.577	299.95
F26	293	283.375	200.075	37.1756	300	300	300	300	300	300	300	300	200.452	300	300	300	300	300	300	300	200.176	300	300	200.312	300	300	300	200.075	200.223	300	300	300	300	300
F27	315	316.377	314.758	1.12613	318.724	316.807	314.758	315.454	315.965	315.011	315.442	316.408	316.88	316.391	316.709	315.653	315.383	316.332	315.357	316.608	315.54	315.704	316.638	319.186	317.125	316.691	318.286	315.289	315.213	315.772	316.399	316.341	318.96	316.277
F28	875	935.189	899.856	16.492	927.773	922.447	925.209	962.059	934.212	931.526	971.098	938.653	930.342	953.052	931.781	924.043	928.914	899.856	948.293	914.076	944.714	963.955	938.11	947.777	927.893	944.808	956.115	923.615	946.03	930.083	946.597	918.047	911.253	913.331

## Sheet: ITLCO2
ITLCO2	30D	the new soldier generation strategy with Sect. 3.2 removed from ITLCO
	ITLCO	ITLCO2	ITLCO2	ITLCO2	ITLCO2 are executed autonomously for a total of 30 iterations on each test function
function	mean	mean	Optimal value	standard deviation	1	2	3	4	5	6	7	8	9	10	11	12	13	14	15	16	17	18	19	20	21	22	23	24	25	26	27	28	29	30
F1	0	6.89243e-05	2.11293e-05	3.79685e-05	7.00088e-05	7.32866e-05	4.06161e-05	7.0225e-05	8.93622e-05	4.96042e-05	0.000136867	7.06238e-05	6.22292e-05	4.54192e-05	3.76737e-05	2.60617e-05	5.07034e-05	6.91126e-05	6.62701e-05	4.08424e-05	4.44802e-05	3.14815e-05	5.47814e-05	0.000143301	7.19362e-05	6.13424e-05	2.11293e-05	5.67899e-05	6.94029e-05	8.53595e-05	5.56227e-05	0.000196084	0.000137845	3.9266e-05
F2	773000	5.92119e+06	2.21318e+06	2.37297e+06	2.77732e+06	7.92942e+06	5.72248e+06	3.16203e+06	9.41255e+06	5.52696e+06	5.46082e+06	4.25912e+06	1.00461e+07	3.06146e+06	8.03289e+06	6.68675e+06	5.87288e+06	4.95322e+06	5.48667e+06	2.81148e+06	4.12821e+06	2.21318e+06	6.29398e+06	3.7504e+06	5.06314e+06	6.09591e+06	6.35641e+06	7.11444e+06	5.50428e+06	6.98071e+06	3.42997e+06	9.65695e+06	7.34234e+06	1.25038e+07
F3	0	0	0	0	0	0	0	0	0	0	0	0	0	0	0	0	0	0	0	0	0	0	0	0	0	0	0	0	0	0	0	0	0	0
F4	9150	18290.1	9965.38	4206.46	20155.4	15476.7	19015.5	14874.8	19383.8	10428.4	12762.2	19083.3	20773.2	16738	26432.9	15694.8	20333.6	17050.9	17993.7	21158.6	25614.6	24243.7	21525.5	14194.1	17232.9	11304.9	18972.5	19706.6	18481.1	24628.4	20752	21324.1	13400.4	9965.38
F5	0	0.000825183	0.000313815	0.00037374	0.000903585	0.000667752	0.000435906	0.00051943	0.00124905	0.000814064	0.000620055	0.000473744	0.000728551	0.000615898	0.000612197	0.000313815	0.00158958	0.00117682	0.00110473	0.000614049	0.00110372	0.000741038	0.00172402	0.000398721	0.000707027	0.00105277	0.000985121	0.00076158	0.00178912	0.000535363	0.000528052	0.000565246	0.000796129	0.000628361
F6	13.6	40.1112	7.23431	25.9879	68.7176	16.6205	45.3284	16.2594	16.2963	16.4004	73.6505	16.7368	20.5597	75.9387	72.6665	16.5853	75.4447	26.5779	24.0512	75.4074	16.6271	17.5526	26.5596	35.7551	17.9195	79.048	16.3992	43.7283	7.23431	78.9005	41.8965	71.5623	76.2426	16.6693
F7	0	0	0	0	0	0	0	0	0	0	0	0	0	0	0	0	0	0	0	0	0	0	0	0	0	0	0	0	0	0	0	0	0	0
F8	21	20.9934	20.8005	0.0618732	20.9726	20.8005	20.9304	20.9827	20.9535	20.9849	20.9703	21.0656	21.0244	21.0715	20.8716	21.0224	20.9656	21.0579	21.0661	21.0581	20.954	21.0495	20.9639	20.9729	20.9387	21.0337	20.9183	20.9924	20.9854	21.0686	21.0165	21.0382	21.0195	21.0516
F9	0	0	0	0	0	0	0	0	0	0	0	0	0	0	0	0	0	0	0	0	0	0	0	0	0	0	0	0	0	0	0	0	0	0
F10	0.0755	0.859143	0.450762	0.209099	0.642978	1.02514	1.03842	0.977677	0.598145	1.06251	0.983959	0.986547	0.468272	0.936012	0.604121	0.651679	1.05582	1.06526	1.0634	0.529396	0.982264	0.785661	1.0121	0.519952	0.450762	0.997326	0.960836	0.993819	0.736514	0.61882	1.04151	1.04623	0.889806	1.04934
F11	0	0	0	0	0	0	0	0	0	0	0	0	0	0	0	0	0	0	0	0	0	0	0	0	0	0	0	0	0	0	0	0	0	0
F12	0	0	0	0	0	0	0	0	0	0	0	0	0	0	0	0	0	0	0	0	0	0	0	0	0	0	0	0	0	0	0	0	0	0
F13	0	0	0	0	0	0	0	0	0	0	0	0	0	0	0	0	0	0	0	0	0	0	0	0	0	0	0	0	0	0	0	0	0	0
F14	909	5142.97	1670.24	1577.18	7346.75	4417.02	4636.67	5353.08	6501.88	4976.31	6111.15	6074.01	5252.96	4823.32	6085.14	1806.94	4442.09	4575.91	6519.1	5986.43	4094.53	6274.43	7334.19	2793.22	3393.4	6131.25	6913.47	5937.47	7202.4	1825.86	6361.3	1670.24	4908.65	4539.79
F15	4270	7056.6	6145.49	413.587	7301.61	6834.35	6975.48	6501.05	7226.76	7411.03	6789.05	6837.3	7671.23	7826.97	7125.48	7383.29	7038.89	6262.71	6535.84	7168.73	7334.52	6896.55	7387.39	6914.38	7461.07	6550.54	7483.89	7592.6	6145.49	6833.12	7538.43	6714.84	7167.62	6787.85
F16	1.49	2.63449	1.6818	0.357374	3.16901	2.85603	2.83525	2.7629	2.88129	2.53253	2.81821	2.72537	2.40113	2.29088	2.08515	2.25931	2.71731	1.72572	2.81212	2.80024	2.48681	3.22175	2.96196	2.96285	1.6818	2.362	2.74588	2.65757	2.73945	3.00363	2.7906	2.3769	2.68369	2.6874
F17	38.1	181.25	123.297	22.16	173.645	167.827	239.407	191.964	151.131	179.147	194.619	154.152	198.1	183.083	185.606	188.568	180.786	168.969	198.923	212.924	188.923	183.333	187.237	160.869	186.681	198.762	189.732	123.297	195.204	138.723	202.836	157.587	180.084	175.393
F18	99.1	222.237	167.001	21.6345	234.793	194.21	201.338	228.399	240.371	191.679	218.03	212.901	206.289	248.761	234.283	222.684	242.552	254.292	214.881	239.197	209.811	212.108	241.938	241.674	220.899	191.17	240.417	235.668	234.684	167.001	259.383	191.404	230.395	205.891
F19	5.63	16.0963	11.6559	1.61685	17.318	16.6248	16.9451	14.2831	14.6047	17.3546	16.6588	14.8797	11.6559	18.5349	14.1313	16.2884	17.9035	17.0546	17.4654	18.0893	13.9242	17.2036	14.8915	17.0674	15.7712	17.3414	15.8168	13.2531	15.4104	17.4659	17.2442	17.6541	14.3509	15.703
F20	0	0.275325	0	1.48267	0	0	0	0	0	0	0	0	0	0	0	0	8.25975	0	0	0	0	0	0	0	0	0	0	0	0	0	0	0	0	0
F21	400	400.003	400.002	0.000521099	400.002	400.003	400.002	400.002	400.002	400.002	400.003	400.003	400.002	400.003	400.002	400.002	400.004	400.002	400.002	400.003	400.003	400.002	400.003	400.002	400.003	400.002	400.004	400.003	400.002	400.002	400.004	400.003	400.003	400.003
F22	871	4972.63	722.405	1564.76	1216.73	3834.23	4617.4	5706.64	5718.03	5574.23	5296.43	5613.26	2897.05	5846.15	5255.62	5756.32	2808.45	722.405	3702	5351.67	6702.58	5840.91	5169.02	6332.62	5985.45	3539.68	6144.68	5354.04	6699.69	2723.67	6393.79	6603.86	5158.32	6613.84
F23	4850	7016.74	4057.72	999.678	7485.79	7548.58	4648.7	6961.97	7079.15	7176.77	7942.53	7167.34	7888.39	6330.95	7087.4	7069.74	6819.92	7977.3	4057.72	6925.8	7885.03	5352.74	7218.25	7949.68	6983.22	7257.35	4784.95	7507.58	7300.33	7371.67	7784.7	7785.97	7940.91	7211.73
F24	200	200.287	200.24	0.0298475	200.307	200.316	200.299	200.26	200.24	200.282	200.296	200.272	200.306	200.289	200.256	200.278	200.265	200.321	200.281	200.288	200.277	200.282	200.265	200.252	200.285	200.322	200.272	200.273	200.326	200.327	200.245	200.374	200.316	200.24
F25	232	227.605	100.391	32.5414	223.887	220.996	287.99	219.257	278.198	218.107	219.66	224.019	222.7	226.232	289.302	225.111	222.264	276.008	220.531	218.49	218.25	224.607	220.353	217.543	223.628	221.942	226.058	221.452	100.391	274.869	218.464	220.698	221.829	225.328
F26	293	300	300	8.42957e-06	300	300	300	300	300	300	300	300	300	300	300	300	300	300	300	300	300	300	300	300	300	300	300	300	300	300	300	300	300	300
F27	315	315.856	314.376	1.18857	315.38	315.794	315.457	317.445	314.846	314.611	315.137	315.401	317.134	314.984	314.376	320.168	315.094	314.977	317.355	315.795	315.54	316.212	316.595	317.117	315.737	315.013	315.51	316.911	316.544	314.484	314.624	315.217	316.688	315.548
F28	875	858.009	100.166	141.318	891.191	871.615	874.411	902.159	882.976	853.858	892.53	865.787	885.75	901.129	883.527	887.724	858.531	100.166	900.195	875.98	886.218	880.362	878.285	896.372	890.066	913.527	883.909	884.804	865.085	881.252	885.558	884.398	882.109	900.805

## Sheet: ITLCO3
ITLCO3	30D	an improved algorithm with a novel replacement update mechanism with Sect. 3.3 removed from ITLCO
	ITLCO	ITLCO3	ITLCO3	ITLCO3	ITLCO3 are executed autonomously for a total of 30 iterations on each test function
function	mean	mean	Optimal value	standard deviation	1	2	3	4	5	6	7	8	9	10	11	12	13	14	15	16	17	18	19	20	21	22	23	24	25	26	27	28	29	30
F1	0	3.03974e-29	0	7.18097e-29	0	0	0	0	0	3.15544e-28	0	1.26218e-29	5.04871e-29	0	0	0	0	5.04871e-29	0	0	0	0	0	0	0	5.04871e-29	5.04871e-29	0	5.04871e-29	7.88861e-29	2.52435e-28	0	0	0
F2	773000	390080	163571	139373	426670	359899	343312	459417	230543	290221	163571	476010	194416	428540	416844	602527	548420	238396	521644	316943	452726	172111	528874	691959	536949	481324	201098	641786	321746	366908	336722	363735	243355	345724
F3	0	0	0	0	0	0	0	0	0	0	0	0	0	0	0	0	0	0	0	0	0	0	0	0	0	0	0	0	0	0	0	0	0	0
F4	9150	5665.71	3242.89	2003.88	10795.4	3783.65	4600.23	3635.51	3852.43	3325.94	3242.89	6718.41	4189.83	5788.49	4632.75	6194.27	3607.47	7256.26	3335.87	4803.52	5666.77	8701.43	7320.79	5626.62	5807.6	5326.06	4208.8	10423.8	4815.62	5130.49	4878.01	8146.02	8579.81	5576.54
F5	0	1.48112e-26	0	7.97607e-26	2.36374e-36	0	0	0	1.48794e-38	0	1.95398e-38	7.15311e-33	3.68084e-41	0	0	1.6961e-39	0	8.2347e-36	1.38864e-37	3.58732e-43	2.38605e-34	0	5.58315e-37	3.08803e-40	0	1.60306e-36	2.38578e-38	5.83263e-44	3.09741e-35	0	0	4.44336e-25	5.52182e-35	1.207e-36
F6	13.6	27.9609	0.582622	25.099	75.5402	14.3656	3.2014	16.4456	68.0638	37.7634	14.36	5.21202	15.2208	72.1941	15.3112	14.4342	14.4506	43.4195	27.9912	14.8484	14.1242	14.8377	73.0365	14.6496	14.5161	0.582622	68.3866	88.1617	15.3071	14.0504	2.19888	14.281	37.5207	14.3511
F7	0	0	0	0	0	0	0	0	0	0	0	0	0	0	0	0	0	0	0	0	0	0	0	0	0	0	0	0	0	0	0	0	0	0
F8	21	20.9611	20.6229	0.0859789	20.9429	21.0015	21.0009	20.9754	20.9901	20.9191	20.8827	21.0234	21.0269	21.0173	20.9909	20.9327	21.0511	20.7917	20.9522	21.0341	20.985	20.983	20.9989	21.0282	21.0688	20.6229	20.9229	21.0265	21.0088	20.8937	20.8852	20.9462	21	20.93
F9	0	0	0	0	0	0	0	0	0	0	0	0	0	0	0	0	0	0	0	0	0	0	0	0	0	0	0	0	0	0	0	0	0	0
F10	0.0755	0.097968	0.0271057	0.0559801	0.0862076	0.0566898	0.209518	0.23609	0.0541868	0.0812753	0.175014	0.113218	0.0492471	0.123205	0.16754	0.108396	0.103383	0.0837808	0.0542089	0.0271057	0.157744	0.0591782	0.0813343	0.0862346	0.0838054	0.101029	0.0541868	0.0369605	0.0591019	0.0714623	0.0468252	0.0271254	0.123185	0.221802
F11	0	0	0	0	0	0	0	0	0	0	0	0	0	0	0	0	0	0	0	0	0	0	0	0	0	0	0	0	0	0	0	0	0	0
F12	0	25.5396	0	52.165	0	133.25	0	0	0	0	0	111.145	0	0	0	0	0	0	0	0	0	109.24	0	152.223	0	0	0	162.597	0	0	0	0	0	97.7325
F13	0	5.32784	0	28.6913	0	0	0	0	0	0	0	0	0	0	159.835	0	0	0	0	0	0	0	0	0	0	0	0	0	0	0	0	0	0	0
F14	909	1586.22	552.005	483.043	552.005	1354.14	1913.23	1533.19	1584.46	1005.92	1417.39	1545.65	1992.83	1610.38	1335.01	2257.83	1796.74	1474.68	1679.18	817.062	2772.98	991.69	1930.44	1586.98	1922.69	2291.23	1118.43	1229.27	1390.3	1600.86	993.404	2476.52	1791.19	1620.99
F15	4270	4239.54	2609.93	884.941	3983.22	5629.94	2700.04	5236.83	2903.36	4626.67	4165.88	4665.96	5014.1	5430.11	3052.97	4586.83	3286.69	5563.66	4250.83	3397.23	3919.79	5161.14	3914.71	3610.23	3782.99	4886.69	4462.69	4711.54	5304.98	3948.97	5358.76	2987.87	2609.93	4031.53
F16	1.49	1.34629	0.587915	0.481225	1.25347	2.11942	0.977315	1.01609	2.21272	0.794648	1.43103	2.24835	1.26851	1.53777	1.99261	1.56579	1.67514	1.21312	0.66422	2.08424	1.60497	1.48725	1.64733	0.989288	0.722926	0.587915	1.41142	1.00715	0.923152	1.06195	0.893702	0.750409	1.95082	1.29603
F17	38.1	75.1804	40.1464	19.8168	121.051	40.1464	62.9464	85.6118	91.3459	79.0103	77.2782	83.6283	107.724	79.6523	61.7564	43.0243	93.7995	62.0158	58.3052	78.5553	69.321	48.9887	74.5723	87.2046	125.324	59.9962	68.6875	70.7956	69.5164	87.0177	47.3922	81.604	67.3654	71.7756
F18	99.1	101.972	30.0032	40.0117	62.0969	92.8842	138.484	70.7009	85.4296	50.0702	112.779	78.0658	186.718	107.769	150.467	143.043	117.12	98.1268	149.403	160.714	89.5104	73.4604	68.2376	59.3683	115.64	152.529	79.0967	56.187	97.3443	129.157	161.422	30.0032	35.643	107.678
F19	5.63	5.88923	3.26616	2.31465	8.33948	10.1467	9.9262	4.5585	4.82314	4.10333	3.96659	3.75207	7.24713	5.21952	5.58811	5.54502	5.0541	4.5667	12.462	6.22138	3.47555	3.26616	6.92144	4.22822	7.14148	5.34851	6.29141	3.52303	3.87246	3.9268	9.76423	8.26731	5.41169	3.71871
F20	0	2.07623	0	3.50779	0	0	0	0	0	7.27792	0	0	0	7.1989	0	0	0	9.92956	8.28721	0	8.9583	0	7.77752	0	7.65257	0	0	5.20489	0	0	0	0	0	0
F21	400	400	400	5.11591e-13	400	400	400	400	400	400	400	400	400	400	400	400	400	400	400	400	400	400	400	400	400	400	400	400	400	400	400	400	400	400
F22	871	1512.72	453.54	665.599	1195.18	2053.09	1529.66	1178.61	1612.72	2087.34	877.182	3595.7	1274.99	658.858	1225.38	2112.96	884.091	1505.62	1011.91	1538.26	2321.85	1453.94	2254.14	1708.56	1382.97	780.988	1264.53	1707.39	919.257	1075.62	2198.07	453.54	2674.31	845.033
F23	4850	4484.41	2949.59	701.374	4253.51	4303.31	4640.13	4776.14	5257.85	4149.42	4614.81	2949.59	4779.05	4671.3	3588.2	3797.07	5900.11	5605.06	5120.73	3435.71	4013.4	4496	4919.38	4308.24	3771.32	5283.98	4790.48	4107.67	3699.54	4768.32	5862.59	4883.84	4026.85	3758.75
F24	200	200.417	200.282	0.0802763	200.386	200.421	200.472	200.602	200.569	200.483	200.349	200.426	200.347	200.512	200.401	200.556	200.441	200.353	200.4	200.336	200.377	200.364	200.438	200.438	200.375	200.371	200.321	200.282	200.473	200.32	200.426	200.386	200.558	200.332
F25	232	244.391	217.032	32.1716	295.244	224.478	285.958	228.584	225.396	228.57	221.136	297.443	220.2	221.727	224.83	302.615	217.032	230.715	220.24	298.031	291.869	225.891	303.926	225.378	224.385	225.887	228.727	225.701	223.862	226.143	226.013	229.185	229.303	303.257
F26	293	296.67	200.093	17.9339	300	300	300	300	300	300	300	300	300	300	300	300	300	300	300	300	300	300	300	300	300	300	300	200.093	300	300	300	300	300	300
F27	315	318.456	315.768	2.0709	318.473	321.395	321.039	316.553	318.326	321.081	316.409	317.584	318.746	317.354	315.768	319.255	317.706	317.286	318.097	325.931	321.35	320.125	316.918	319.52	317.593	316.822	316.73	317.738	317.398	317.106	316.807	319.021	316.704	318.845
F28	875	899.567	869.21	17.4977	883.295	879.23	899.163	922.271	890.505	884.297	879.527	869.21	897.124	873.293	908.119	902.573	942.313	915.071	894.685	899.699	901.545	906.976	918.961	910.951	890.361	925.125	901.881	927.377	882.742	888.499	897.874	905.572	873.137	915.641
